# Supplementary material for: Reductive coupling of benzyl bromide catalyzed by a novel dicobalt complex having two salen units
Source: Royal Society of Chemistry journal article supplement (doi:10.1039/b010022f), 2001-01-01
Supplement: figs1.pdf [file figs1.pdf]

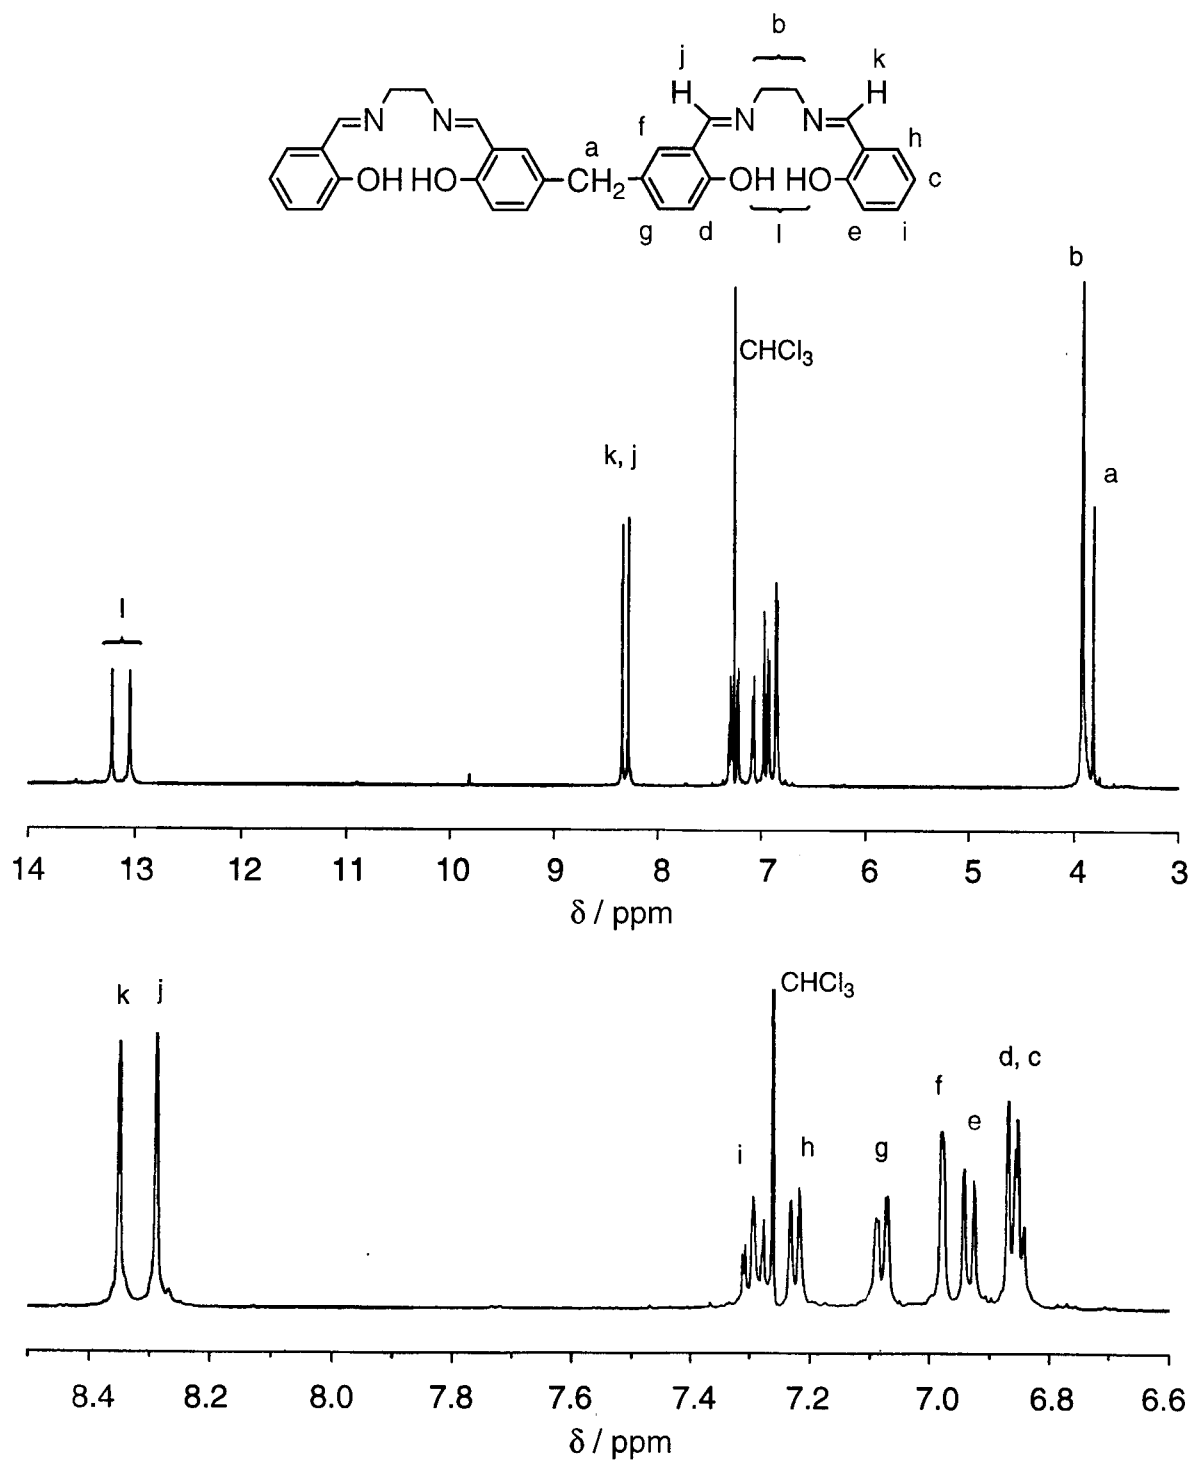

Fig. S1 The downfield region of  $^1\text{H}$  NMR (500 MHz) spectra of **L** in  $\text{CDCl}_3$ . The assignments correspond to those in the figure (vide infra).
