# Supplementary material for: Reductive coupling of benzyl bromide catalyzed by a novel dicobalt complex having two salen units
Source: Royal Society of Chemistry journal article supplement (doi:10.1039/b010022f), 2001-01-01
Supplement: figs2.pdf [file figs2.pdf]

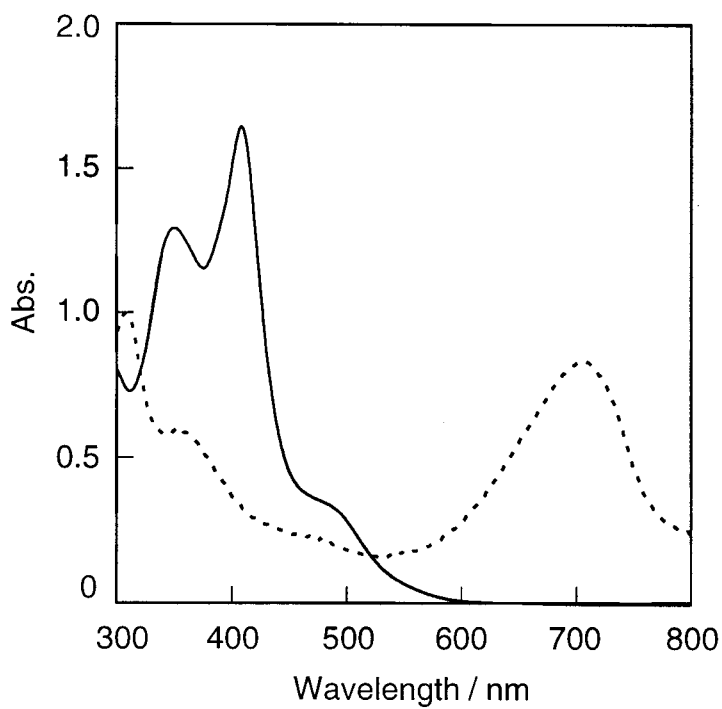

Fig. S2 UV-VIS absorption spectra of the dicobalt complex at various oxidation states;  $[\text{Co}^{\text{II}}_2\text{L}]$  (—,  $1.0 \times 10^{-4}$  M) in  $\text{CH}_3\text{CN}$  and  $[\text{Co}^{\text{I}}_2\text{L}]$  (---,  $4.8 \times 10^{-5}$  M) in thf.
