# Supplementary material for: Reductive coupling of benzyl bromide catalyzed by a novel dicobalt complex having two salen units
Source: Royal Society of Chemistry journal article supplement (doi:10.1039/b010022f), 2001-01-01
Supplement: figs3.pdf [file figs3.pdf]

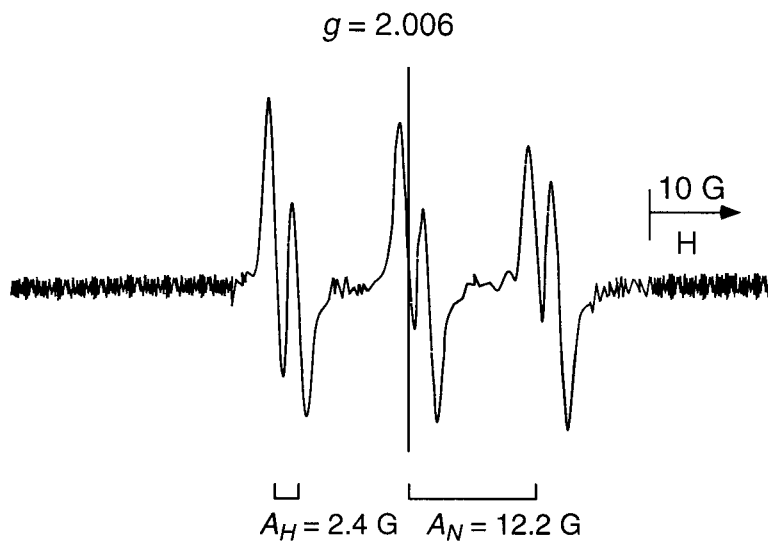

Fig. S3 ESR spectrum observed during the electrolysis at  $-1.4\text{ V}$  vs. Ag/AgCl in dmf containing  $[\text{Co}^{\text{II}}_2\text{L}]$  ( $5.0 \times 10^{-4}\text{ M}$ ), benzyl bromide ( $5.0 \times 10^{-3}\text{ M}$ ), PBN ( $3.9 \times 10^{-1}\text{ M}$ ), and TBAF ( $1.0 \times 10^{-1}\text{ M}$ ) at room temperature.
